# Supplementary material for: Does changing to brighter road lighting improve road safety? Multilevel longitudinal analysis of road traffic collision frequency during the relighting of a UK city
Source: HighWire-hosted journal article supplement (doi:10.1136/jech-2019-212208), 2020-03-02
Supplement: jech-2019-212208supp005_data_supplement.pdf [file jech-2019-212208supp005_data_supplement.pdf]

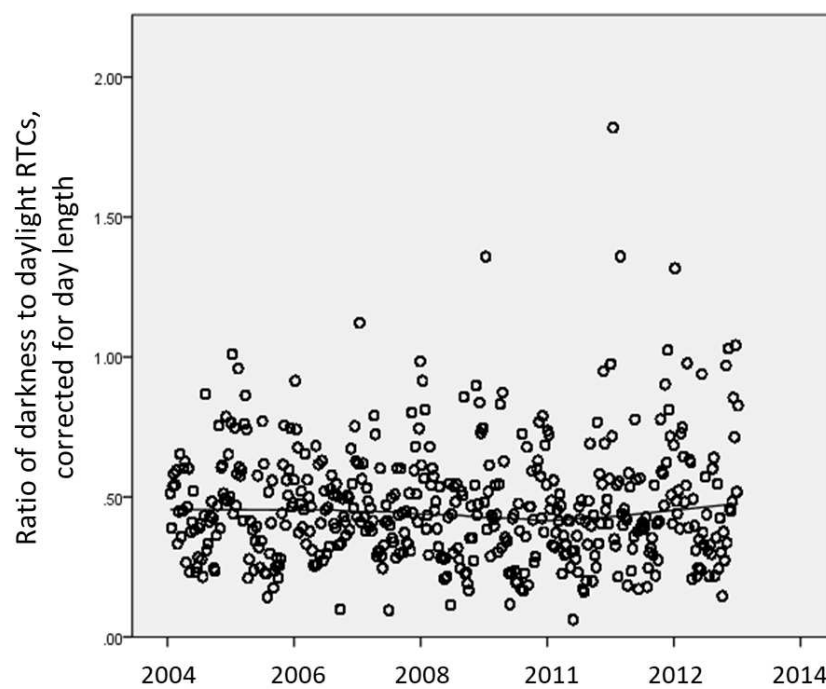

Figure S5. Time series plot of the ratio between time-exposure compensated darkness to daylight RTC rates for the whole City, with an Epanechnikov (40%) smoother put through the ratio data.
